# Supplementary material for: Organic Food Consumption among Households in Hanoi: Importance of Situational Factors
Source: MDPI journal article supplement (doi:10.3390/su132212496), 2021-11-12
Supplement: s1 [file s1]

# Organic Food Consumption Among Households in Hanoi: Importance of Situational Factors

## Questionnaires

### QUESTIONNAIRE SURVEY

#### ABOUT ORGANIC FOOD PURCHASE AMONG HOUSEHOLDS IN HANOI

Dear Sir/Madam!

The current practice about green consumption provides us a high motivation to determine factors affecting the green consumption gap by using the holistic approach in an attempt to give recommendations which allow to promote organic food consumption in this city. We would greatly appreciate if you kindly give us some feedback on answering the below questions. All information on this survey will be used only for research but not for any other purposes.

1. Respondent's Name:
2. Gender:
  - ☐ Man
  - ☐ Woman
  - ☐ Others
3. Age
  - ☐ 15–20
  - ☐ 21–34
  - ☐ 35–49
  - ☐ 50–64
  - ☐ Above 64
4. Education status
  - ☐ Less than high school
  - ☐ High school
  - ☐ Bachelor's Degree
  - ☐ Postgraduate
5. Current employment status
  - ☐ Employed
  - ☐ Self Employed
  - ☐ Unemployed
  - ☐ Retired
6. Relationship status
  - ☐ Be single or divorced, live alone
  - ☐ Be single or divorced, live with parents, children, siblings, friends
  - ☐ Get married, no children
  - ☐ Get married, with children
7. Household incomes
  - ☐ Less than 10 million dong
  - ☐ From 10 million dong to 20 million dong
  - ☐ From 20 million dong to 40 million dong
  - ☐ From 40 million dong to 60 million dong
  - ☐ More than 60 million dong
8. How many people do you live with?
  - ☐ No one
  - ☐ One person
  - ☐ Two people
  - ☐ Three people
  - ☐ Four people
  - ☐ More than 4 people
9. Where are you living?
  - ☐ Hanoi
  - ☐ Hồ Chí Minh City
  - ☐ Others
10. Are you mainly in charge of buying food for family?
  - ☐ Yes
  - ☐ No

Figure S1. Respondents' profile.

## SURVEY CONTENT

### 1. Your opinions about organic food.

| Opinions                                                                    | 1                        | 2                        | 3                        | 4                        | 5                        |
|-----------------------------------------------------------------------------|--------------------------|--------------------------|--------------------------|--------------------------|--------------------------|
| Organic food is clean, fresh (no conservative), healthy and close to nature | <input type="checkbox"/> |
| Organic food tastes better than non-green products.                         | <input type="checkbox"/> |
| Organic food doesn't cause any allergy                                      | <input type="checkbox"/> |

### 2. Frequency level of your family's organic food consumption

- ☐ Everyday or almost everyday  
☐ 4-5 times a week  
☐ 2-3 times a week  
☐ Once a week  
☐ Several times a month  
☐ Less frequently  
☐ We don't consume organic food

### 3. Importance of factors leading to organic food consumption.

| Factors                    | 1                        | 2                        | 3                        | 4                        | 5                        |
|----------------------------|--------------------------|--------------------------|--------------------------|--------------------------|--------------------------|
| Attitude                   | <input type="checkbox"/> |
| Subjective Norms           | <input type="checkbox"/> |
| Perceived behavior control | <input type="checkbox"/> |
| Price                      | <input type="checkbox"/> |
| Availability               | <input type="checkbox"/> |
| Income                     | <input type="checkbox"/> |
| Education                  | <input type="checkbox"/> |
| Social Norms               | <input type="checkbox"/> |

### 4. Your attitude about organic food consumption.

| Opinions                                                                                                                                                                                  | 1                        | 2                        | 3                        | 4                        | 5                        |
|-------------------------------------------------------------------------------------------------------------------------------------------------------------------------------------------|--------------------------|--------------------------|--------------------------|--------------------------|--------------------------|
| I consider myself to be knowledgeable about the positive impact of organic food consumption on the human health (For instance: safe for health, good taste, freshness, no allergy, etc.). | <input type="checkbox"/> |
| With the consumption of organic food, I can make a small contribution to environment protection.                                                                                          |                          |                          |                          |                          |                          |
| I have a favorable attitude toward organic food consumption.                                                                                                                              | <input type="checkbox"/> |

### 5. Subjective norms.

| Opinions                                                                   | 1                        | 2                        | 3                        | 4                        | 5                        |
|----------------------------------------------------------------------------|--------------------------|--------------------------|--------------------------|--------------------------|--------------------------|
| Most people who are important to me think I should consume organic food.   | <input type="checkbox"/> |
| People whose opinions I value would prefer that I to consume organic food. | <input type="checkbox"/> |

### 6. Perceived behavior control.

| Opinions                                                | 1                        | 2                        | 3                        | 4                        | 5                        |
|---------------------------------------------------------|--------------------------|--------------------------|--------------------------|--------------------------|--------------------------|
| I can afford organic food consumption.                  |                          |                          |                          |                          |                          |
| I have control over my ability to consume organic food. | <input type="checkbox"/> |

### 7. Price of organic food.

| Opinions                                    | 1                        | 2                        | 3                        | 4                        | 5                        |
|---------------------------------------------|--------------------------|--------------------------|--------------------------|--------------------------|--------------------------|
| Organic food is quite expensive.            | <input type="checkbox"/> |
| I am willing to pay extra for organic food. | <input type="checkbox"/> |

8. Availability of organic food.

| Opinions                                                                                                                                   | 1                        | 2                        | 3                        | 4                        | 5                        |
|--------------------------------------------------------------------------------------------------------------------------------------------|--------------------------|--------------------------|--------------------------|--------------------------|--------------------------|
| There are a variety of kinds of organic food                                                                                               | <input type="checkbox"/> |
| I easily find organic food which I want to consume in trusting food shopping places.                                                       | <input type="checkbox"/> |
| I trust food shopping places because food origin is transparent                                                                            | <input type="checkbox"/> |
| I trust food shopping places because those places have good reputation or they are recommended by friends and I already used the products. | <input type="checkbox"/> |

9. Social norms.

| Opinions                                                                                         | 1                        | 2                        | 3                        | 4                        | 5                        |
|--------------------------------------------------------------------------------------------------|--------------------------|--------------------------|--------------------------|--------------------------|--------------------------|
| Organic food consumption is strongly encouraged or supported.                                    | <input type="checkbox"/> |
| There are regulations or laws which punish people who sell unhealthy food.                       | <input type="checkbox"/> |
| There are regulations or laws which encourage producers to deliver organic food or support them. | <input type="checkbox"/> |
| Regulations related to organic food are efficient.                                               | <input type="checkbox"/> |

**Cronbach' Alpha**

**Table S1** KNL.

| Reliability Statistics |                            |                                |                                  |                                  |
|------------------------|----------------------------|--------------------------------|----------------------------------|----------------------------------|
| Cronbach's Alpha       | N of Items                 |                                |                                  |                                  |
| 0.766                  | 3                          |                                |                                  |                                  |
| Item-Total Statistics  |                            |                                |                                  |                                  |
|                        | Scale Mean if Item Deleted | Scale Variance if Item Deleted | Corrected Item-Total Correlation | Cronbach's Alpha if Item Deleted |
| KNL1                   | 4.73                       | 2.969                          | 0.538                            | 0.751                            |
| KNL2                   | 6.54                       | 2.723                          | 0.624                            | 0.657                            |
| KNL3                   | 6.55                       | 2.575                          | 0.637                            | 0.641                            |

**Table S2.** PRI.

| Reliability Statistics |                            |                                |                                  |                                  |
|------------------------|----------------------------|--------------------------------|----------------------------------|----------------------------------|
| Cronbach's Alpha       | N of Items                 |                                |                                  |                                  |
| 0.812                  | 2                          |                                |                                  |                                  |
| Item-Total Statistics  |                            |                                |                                  |                                  |
|                        | Scale Mean if Item Deleted | Scale Variance if Item Deleted | Corrected Item-Total Correlation | Cronbach's Alpha if Item Deleted |
| PRI1                   | 3.35                       | 1.032                          | 0.684                            |                                  |
| PRI2                   | 3.36                       | 0.936                          | 0.684                            |                                  |

**Table S3.** AVA.

| Reliability Statistics |                            |                                |                                  |                                  |
|------------------------|----------------------------|--------------------------------|----------------------------------|----------------------------------|
| Cronbach's Alpha       | N of Items                 |                                |                                  |                                  |
| 0.798                  | 2                          |                                |                                  |                                  |
| Item-Total Statistics  |                            |                                |                                  |                                  |
|                        | Scale Mean if Item Deleted | Scale Variance if Item Deleted | Corrected Item-Total Correlation | Cronbach's Alpha if Item Deleted |
| AVA1                   | 3.41                       | 0.778                          | 0.664                            |                                  |
| AVA2                   | 3.41                       | 0.783                          | 0.664                            |                                  |

**Table S4.** ATT.

| Reliability Statistics     |                                |                                  |                                  |       |
|----------------------------|--------------------------------|----------------------------------|----------------------------------|-------|
| Cronbach's Alpha           | N of Items                     |                                  |                                  |       |
| 0.847                      | 3                              |                                  |                                  |       |
| Item-Total Statistics      |                                |                                  |                                  |       |
| Scale Mean if Item Deleted | Scale Variance if Item Deleted | Corrected Item-Total Correlation | Cronbach's Alpha if Item Deleted |       |
| ATT1                       | 7.71                           | 2.556                            | 0.726                            | 0.776 |
| ATT2                       | 7.75                           | 2.595                            | 0.704                            | 0.797 |
| ATT3                       | 7.78                           | 2.506                            | 0.714                            | 0.788 |

**Table S5.** SUN.

| Reliability Statistics     |                                |                                  |                                  |
|----------------------------|--------------------------------|----------------------------------|----------------------------------|
| Cronbach's Alpha           | N of Items                     |                                  |                                  |
| 0.760                      | 2                              |                                  |                                  |
| Item-Total Statistics      |                                |                                  |                                  |
| Scale Mean if Item Deleted | Scale Variance if Item Deleted | Corrected Item-Total Correlation | Cronbach's Alpha if Item Deleted |
| SUN1                       | 3.20                           | 0.859                            | 0.613                            |
| SUN2                       | 3.22                           | 0.865                            | 0.613                            |

**Table S6.** PBC.

| Reliability Statistics     |                                |                                  |                                  |
|----------------------------|--------------------------------|----------------------------------|----------------------------------|
| Cronbach's Alpha           | N of Items                     |                                  |                                  |
| 0.785                      | 2                              |                                  |                                  |
| Item-Total Statistics      |                                |                                  |                                  |
| Scale Mean if Item Deleted | Scale Variance if Item Deleted | Corrected Item-Total Correlation | Cronbach's Alpha if Item Deleted |
| PBC1                       | 3.47                           | 0.643                            | 0.647                            |
| PBC2                       | 3.41                           | 0.725                            | 0.647                            |

**Table S7.** SON.

| Reliability Statistics |                            |                                |                                  |                                  |
|------------------------|----------------------------|--------------------------------|----------------------------------|----------------------------------|
| Cronbach's Alpha       | N of Items                 |                                |                                  |                                  |
| 0.841                  | 4                          |                                |                                  |                                  |
| Item-Total Statistics  |                            |                                |                                  |                                  |
|                        | Scale Mean if Item Deleted | Scale Variance if Item Deleted | Corrected Item-Total Correlation | Cronbach's Alpha if Item Deleted |
| SON1                   | 10.47                      | 4.752                          | 0.594                            | 0.838                            |
| SON2                   | 11.23                      | 4.604                          | 0.732                            | 0.774                            |
| SON3                   | 11.20                      | 4.803                          | 0.695                            | 0.791                            |
| SON4                   | 11.17                      | 4.854                          | 0.692                            | 0.793                            |

## Exploratory Factor Analysis (EFA)

**Table S8.** KMO and Bartlett's test.

|                                                  |                    |          |
|--------------------------------------------------|--------------------|----------|
| Kaiser-Meyer-Olkin Measure of Sampling Adequacy. |                    | 0.805    |
| Bartlett's Test of Sphericity                    | Approx. Chi-Square | 3002.424 |
|                                                  | df                 | 0153     |
|                                                  | Sig.               | 0        |

**Table S9.** Total variance explained.

| Factor | Initial Eigenvalues | Extraction Sums of Squared Loadings | Rotation Sums of Squared Loadings <sup>a</sup> |
|--------|---------------------|-------------------------------------|------------------------------------------------|
|--------|---------------------|-------------------------------------|------------------------------------------------|

|    | Total | % of Vari-<br>ance | Cumulative<br>% | Total | % of Vari-<br>ance | Cumulative<br>% | Total |
|----|-------|--------------------|-----------------|-------|--------------------|-----------------|-------|
| 1  | 5.207 | 28.928             | 28.928          | 4.834 | 26.856             | 26.856          | 3.548 |
| 2  | 1.985 | 11.026             | 39.953          | 1.589 | 8.827              | 35.682          | 3.337 |
| 3  | 1.806 | 10.035             | 49.989          | 1.449 | 8.051              | 43.734          | 2.757 |
| 4  | 1.453 | 8.072              | 58.061          | 1.129 | 6.273              | 50.007          | 2.025 |
| 5  | 1.181 | 6.562              | 64.623          | 0.797 | 4.429              | 54.436          | 2.523 |
| 6  | 1.111 | 6.170              | 70.793          | 0.750 | 4.168              | 58.604          | 1.599 |
| 7  | 1.033 | 5.741              | 76.534          | 0.672 | 3.733              | 62.337          | 2.402 |
| 8  | 0.578 | 3.209              | 79.743          |       |                    |                 |       |
| 9  | 0.520 | 2.889              | 82.632          |       |                    |                 |       |
| 10 | 0.458 | 2.543              | 85.175          |       |                    |                 |       |
| 11 | 0.411 | 2.282              | 87.457          |       |                    |                 |       |
| 12 | 0.374 | 2.080              | 89.536          |       |                    |                 |       |
| 13 | 0.354 | 1.967              | 91.504          |       |                    |                 |       |
| 14 | 0.349 | 1.938              | 93.442          |       |                    |                 |       |
| 15 | 0.317 | 1.759              | 95.201          |       |                    |                 |       |
| 16 | 0.302 | 1.677              | 96.878          |       |                    |                 |       |
| 17 | 0.293 | 1.630              | 98.508          |       |                    |                 |       |
| 18 | 0.269 | 1.492              | 100.000         |       |                    |                 |       |

Extraction Method: Principal Axis Factoring. <sup>a</sup> When factors are correlated, sums of squared loadings cannot be added to obtain a total variance.

**Table S10.** Pattern matrix.

|      | Factor |       |       |       |       |       |       |
|------|--------|-------|-------|-------|-------|-------|-------|
|      | 1      | 2     | 3     | 4     | 5     | 6     | 7     |
| SON2 | 0.830  |       |       |       |       |       |       |
| SON3 | 0.802  |       |       |       |       |       |       |
| SON4 | 0.788  |       |       |       |       |       |       |
| SON1 | 0.592  |       |       |       |       |       |       |
| ATT1 |        | 0.832 |       |       |       |       |       |
| ATT2 |        | 0.811 |       |       |       |       |       |
| ATT3 |        | 0.747 |       |       |       |       |       |
| KNL2 |        |       | 0.808 |       |       |       |       |
| KNL3 |        |       | 0.738 |       |       |       |       |
| KNL1 |        |       | 0.610 |       |       |       |       |
| AVA1 |        |       |       | 0.824 |       |       |       |
| AVA2 |        |       |       | 0.807 |       |       |       |
| PRI2 |        |       |       |       | 0.832 |       |       |
| PRI1 |        |       |       |       | 0.818 |       |       |
| PBC1 |        |       |       |       |       | 0.804 |       |
| PBC2 |        |       |       |       |       | 0.802 |       |
| SUN2 |        |       |       |       |       |       | 0.785 |
| SUN1 |        |       |       |       |       |       | 0.760 |

Extraction Method: Principal Axis Factoring.  
Rotation Method: Promax with Kaiser Normalization.

<sup>a</sup>. Rotation converged in 6 iterations.

### Confirmatory Factor Analysis (CFA)

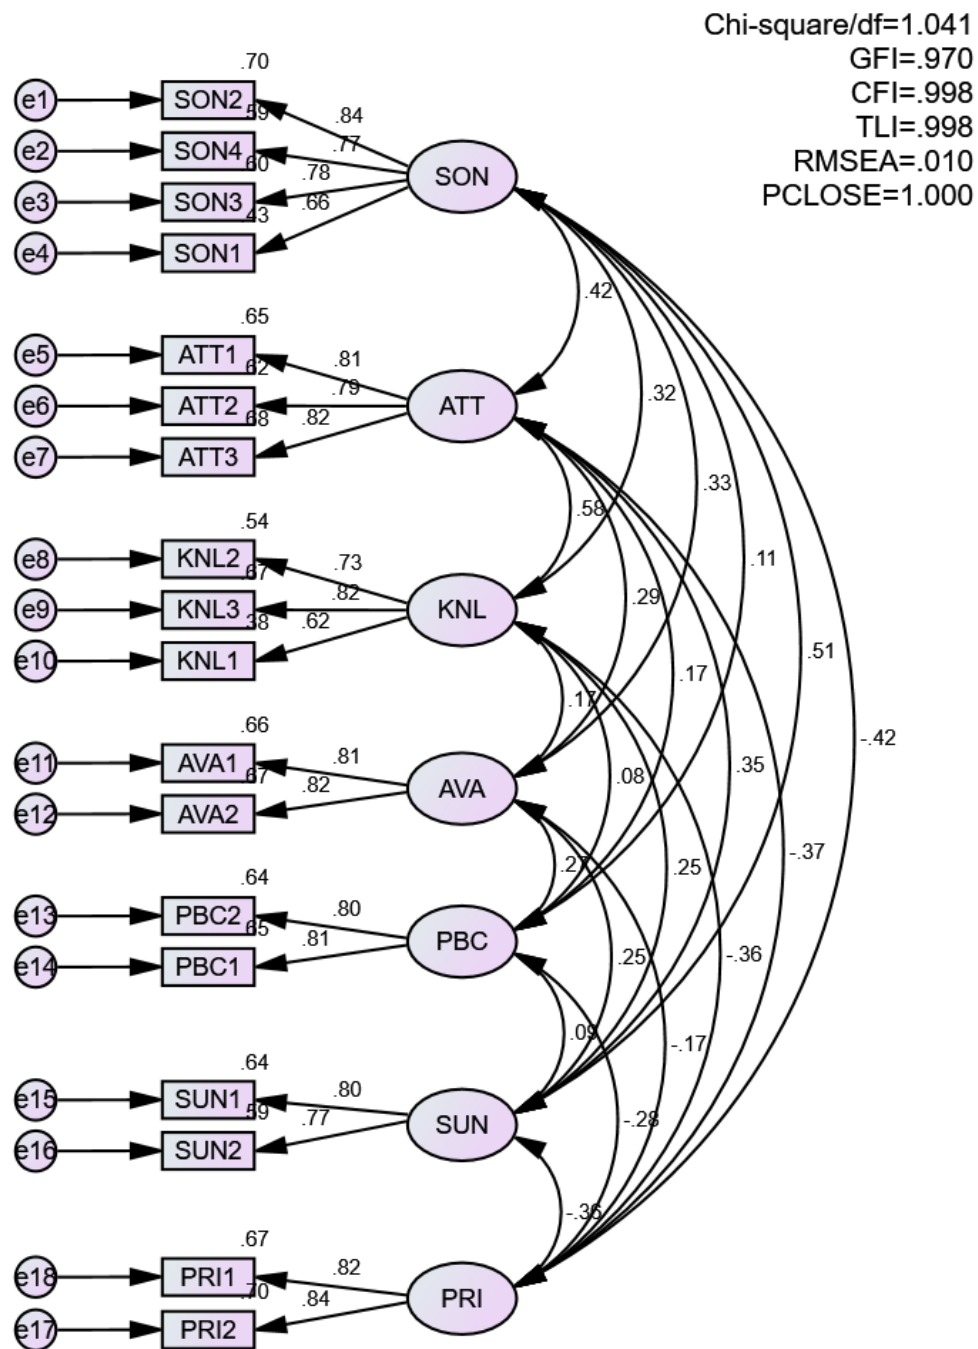

Figure S2. Results of CFA.

Table S11. CMIN.

| Model              | NPAR | CMIN     | DF    | P     | CMIN/DF |
|--------------------|------|----------|-------|-------|---------|
| Default model      | 57   | 118.652  | 114   | 0.364 | 1.041   |
| Saturated model    | 171  | 0.000    | 0.000 |       |         |
| Independence model | 18   | 3051.841 | 153   | 0     | 19.947  |

Table S12. RMR, GFI.

| 9                  | RMR   | GFI   | AGFI  | PGFI  |
|--------------------|-------|-------|-------|-------|
| Default model      | 0.020 | 0.970 | 0.955 | 0.647 |
| Saturated model    | 0.000 | 1.000 |       |       |
| Independence model | 0.214 | 0.430 | 0.363 | 0.385 |

**Table S13.** Baseline comparisons.

| Model              | NFI<br>Delta1 | RFI<br>rho1 | IFI<br>Delta2 | TLI<br>rho2 | CFI   |
|--------------------|---------------|-------------|---------------|-------------|-------|
| Default model      | 0.961         | 0.948       | 0.998         | 0.998       | 0.998 |
| Saturated model    | 1.000         |             | 1.000         |             | 1.000 |
| Independence model | 0.000         | 0.000       | 0.000         | 0.000       | 0.000 |

**Table S14.** RMSEA.

| Model              | RMSEA | LO 90 | HI 90 | PCLOSE |
|--------------------|-------|-------|-------|--------|
| Default model      | 0.010 | 0.000 | 0.027 | 1.000  |
| Independence model | 0.212 | 0.205 | 0.218 | 0.000  |

**Table S15.** Standardized regression weights: (Group – Default model).

|      |      |     |  | Estimate |
|------|------|-----|--|----------|
| SON2 | <--- | SON |  | 0.835    |
| SON4 | <--- | SON |  | 0.770    |
| SON3 | <--- | SON |  | 0.777    |
| SON1 | <--- | SON |  | 0.657    |
| ATT1 | <--- | ATT |  | 0.808    |
| ATT2 | <--- | ATT |  | 0.785    |
| ATT3 | <--- | ATT |  | 0.823    |
| KNL2 | <--- | KNL |  | 0.734    |
| KNL3 | <--- | KNL |  | 0.818    |
| KNL1 | <--- | KNL |  | 0.617    |
| AVA1 | <--- | AVA |  | 0.809    |
| AVA2 | <--- | AVA |  | 0.821    |
| PBC2 | <--- | PBC |  | 0.802    |
| PBC1 | <--- | PBC |  | 0.807    |
| SUN1 | <--- | SUN |  | 0.797    |
| SUN2 | <--- | SUN |  | 0.768    |
| PRI1 | <--- | PRI |  | 0.817    |
| PRI2 | <--- | PRI |  | 0.838    |

**Table S16.** Standardized regression weights.

|         | CR    | AVE   | MSV   | SON           | ATT           | KNL           | AVA          | PBC           | SUN           | PRI   |
|---------|-------|-------|-------|---------------|---------------|---------------|--------------|---------------|---------------|-------|
| SON     | 0.847 | 0.581 | 0.263 | 0.763         |               |               |              |               |               |       |
| ATT     | 0.847 | 0.649 | 0.340 | 0.416**<br>*  | 0.805         |               |              |               |               |       |
| KNL     | 0.769 | 0.530 | 0.340 | 0.323**<br>*  | 0.583**<br>*  | 0.728         |              |               |               |       |
| AV<br>A | 0.798 | 0.665 | 0.109 | 0.329**<br>*  | 0.294**<br>*  | 0.174**       | 0.815        |               |               |       |
| PBC     | 0.786 | 0.647 | 0.078 | 0.115†        | 0.170**       | 0.083         | 0.273**<br>* | 0.804         |               |       |
| SUN     | 0.760 | 0.613 | 0.263 | 0.513**<br>*  | 0.351**<br>*  | 0.248**<br>*  | 0.254**<br>* | 0.090         | 0.783         |       |
| PRI     | 0.813 | 0.684 | 0.176 | -0.420*<br>** | -0.371*<br>** | -0.361*<br>** | -0.168*<br>* | -0.280**<br>* | -0.360**<br>* | 0.827 |

## Education

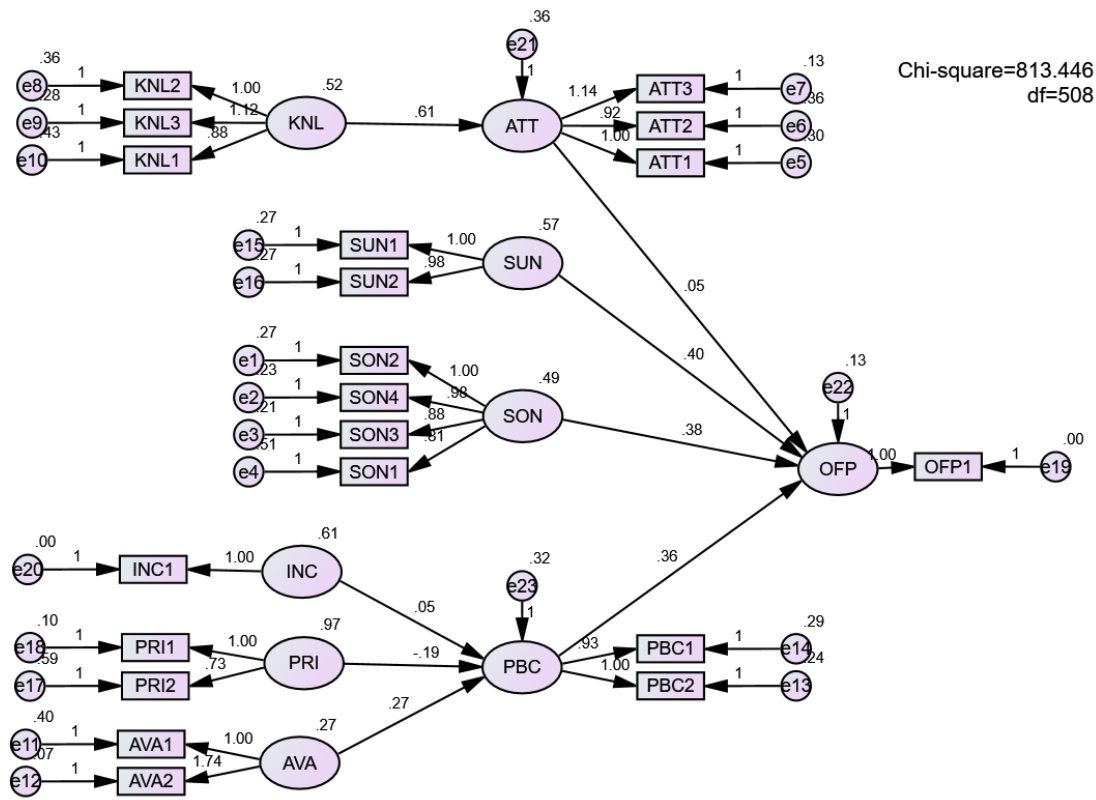

Figure S3. Invariance.

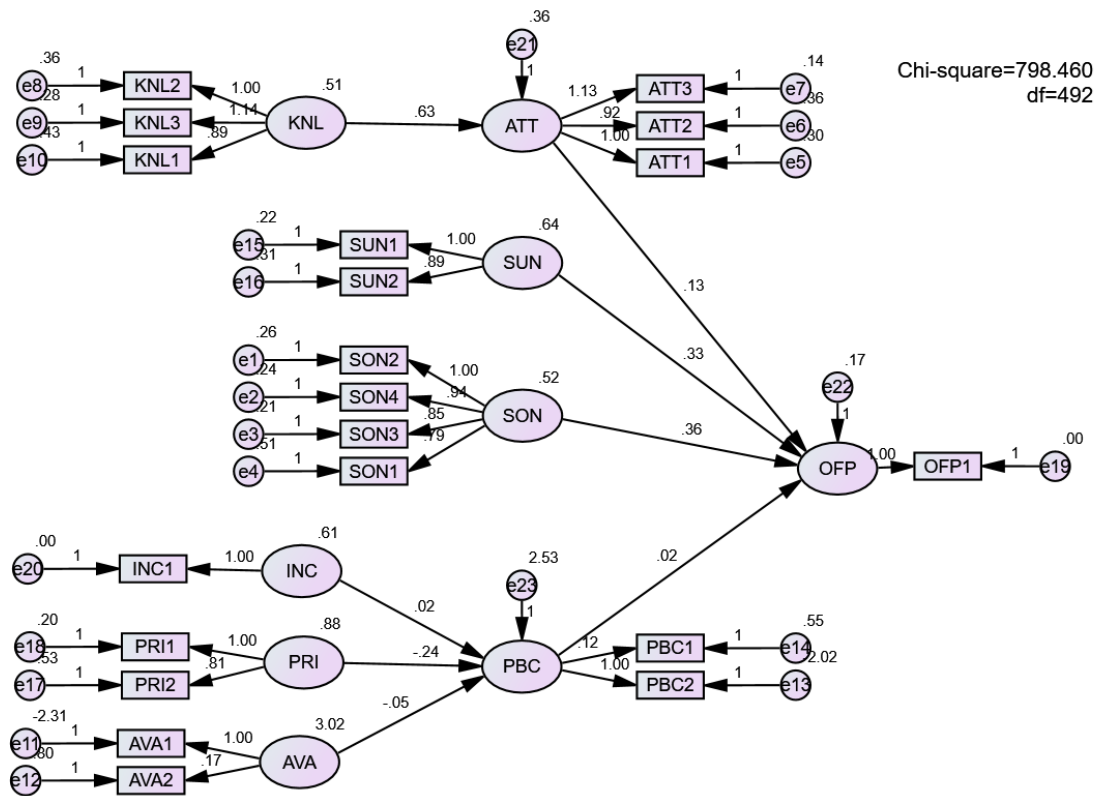

Figure S4. Mutability.

## Age

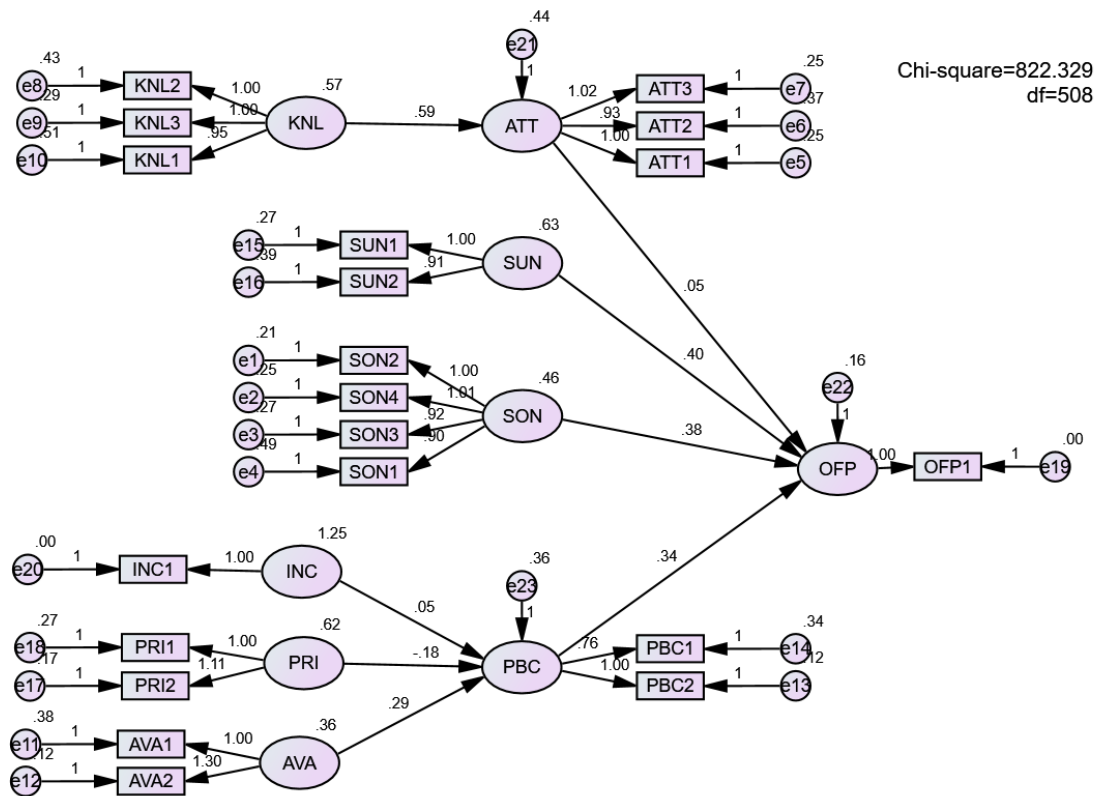

Figure S5. Invariance.

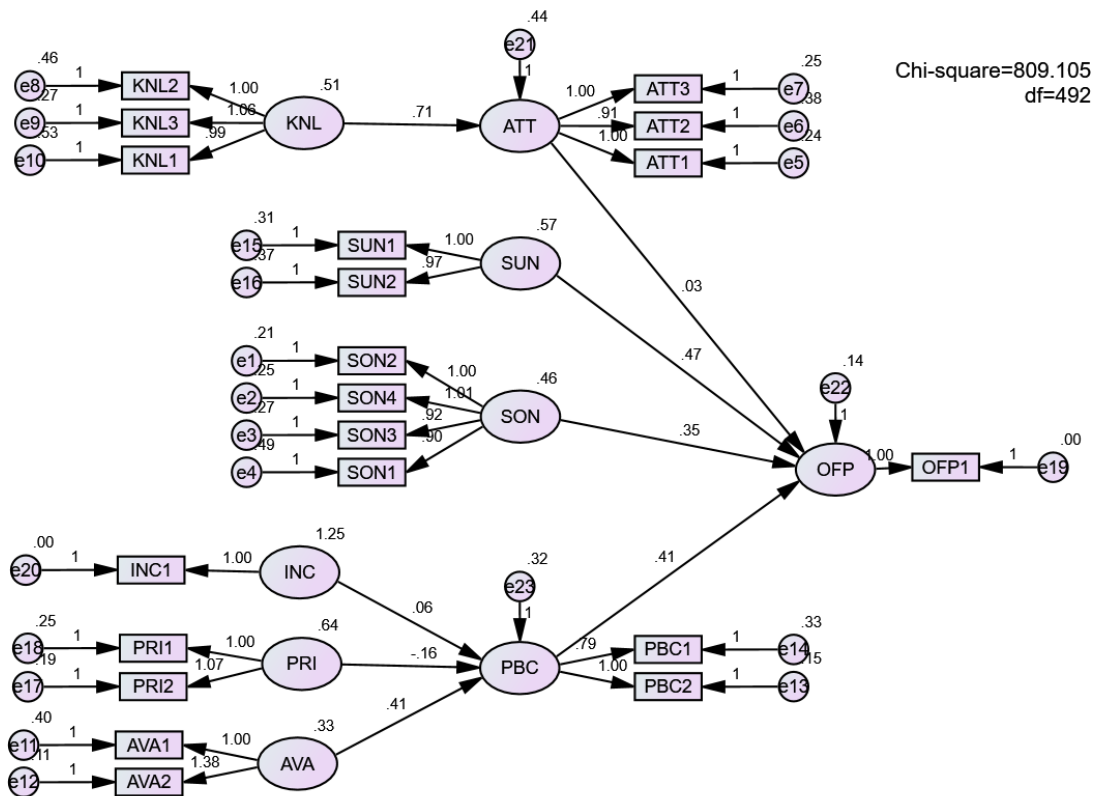

Figure S6. Mutability.

### Importance of factors from respondents' perspectives

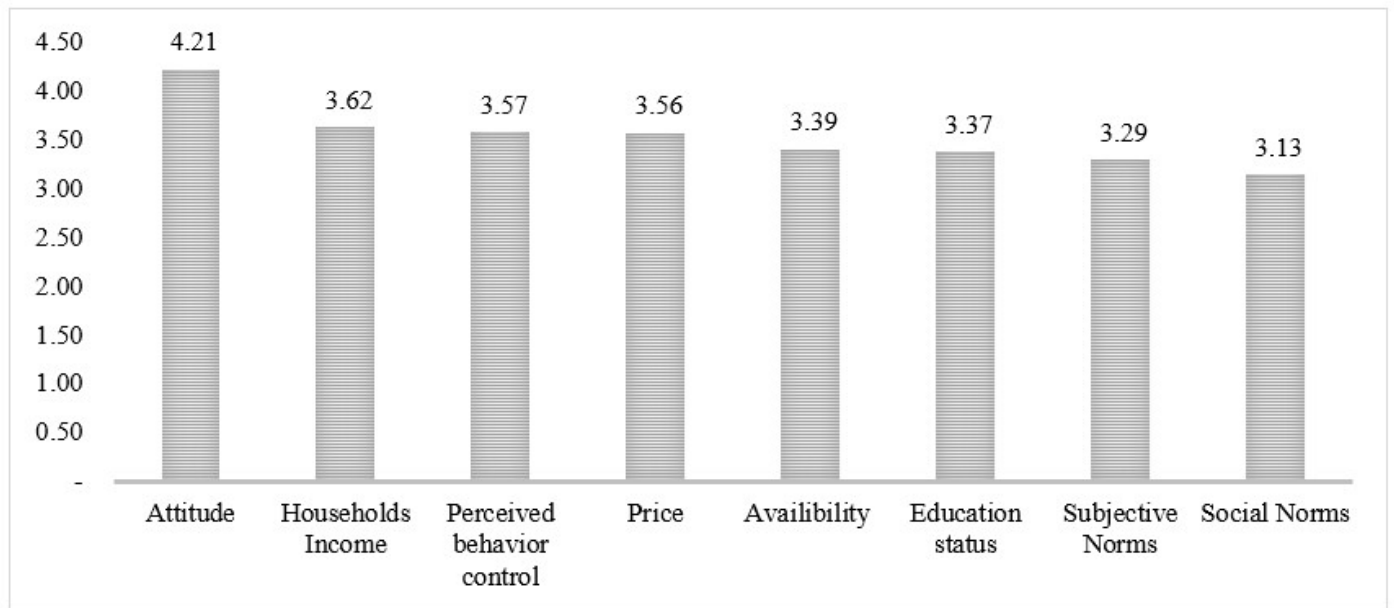

Figure S7. Opinions of respondents about the importance of factors.
