# Supplementary material for: Organic Food Consumption among Households in Hanoi: Importance of Situational Factors
Source: MDPI journal article supplement (doi:10.3390/su132212496), 2021-11-12
Supplement: s1 [file s1]

Archive with 1 entries (1 files):
- sustainability-1415252-supplementary.pdf
